# Supplementary material
Source: PubMed Central journal article supplement (PMC3609650)

**a**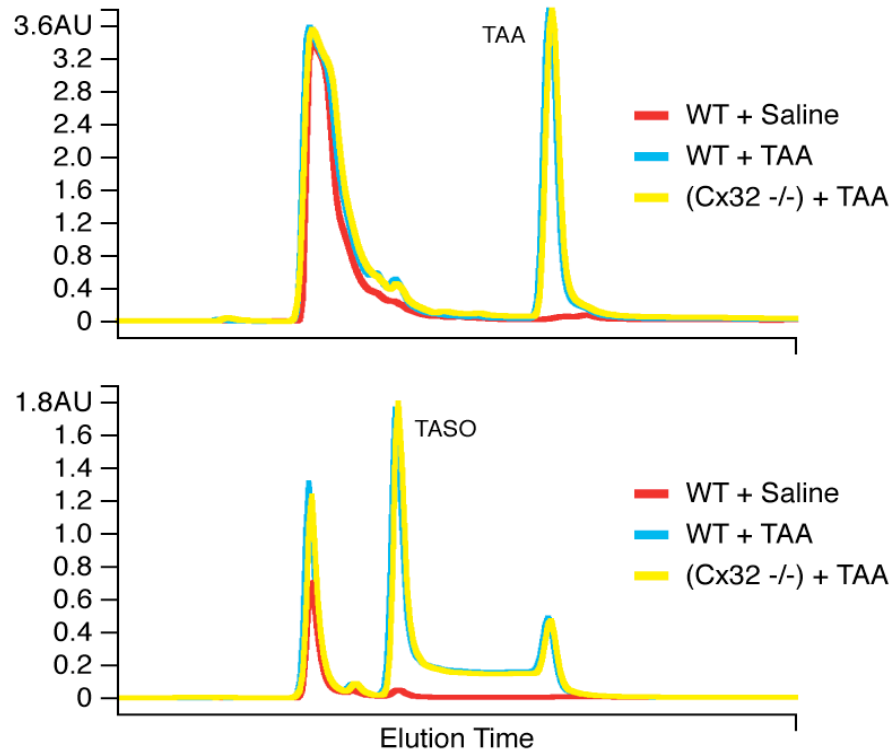**b**

|               | Cx32 +/+ Saline | Cx32 +/+ TAA       | Cx32 -/- TAA       |
|---------------|-----------------|--------------------|--------------------|
| TAA (mg/mL)   | -               | 986 ± 31           | 983 ± 27           |
| TASSO (mg/mL) | -               | 187 ± 13           | 178 ± 9            |
|               | Cx32 +/+ DMSO   | Cx32 +/+ DMSO +TAA | Cx32 +/+ 2APB +TAA |
| TAA (mg/mL)   | -               | 1003 ± 28          | 995 ± 36           |
| TASSO (mg/mL) | -               | 162 ± 18           | 148 ± 21           |

Supplement: NIHMS449575-supplement-Supplementary_Figure_1.pdf [file NIHMS449575-supplement-Supplementary_Figure_1.pdf]

**a**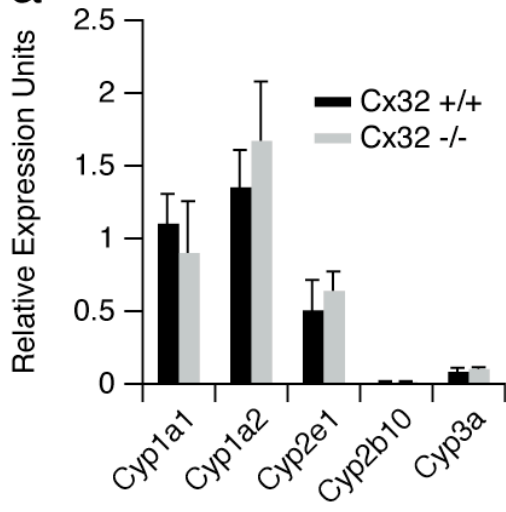**b**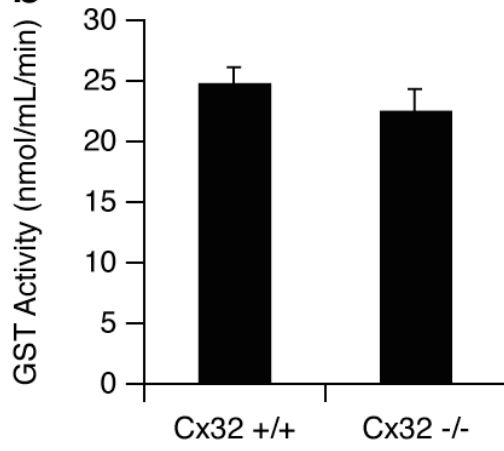**c**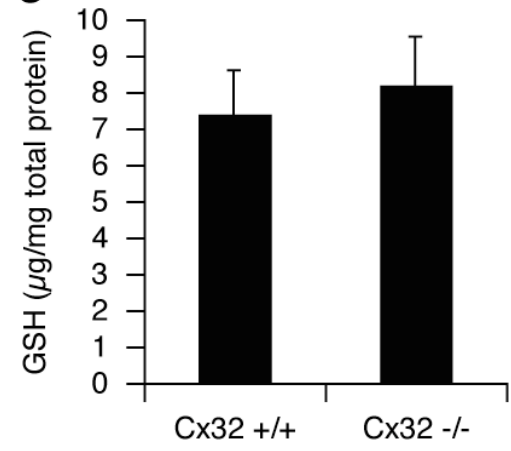

Supplement: NIHMS449575-supplement-Supplementary_Figure_2.pdf [file NIHMS449575-supplement-Supplementary_Figure_2.pdf]

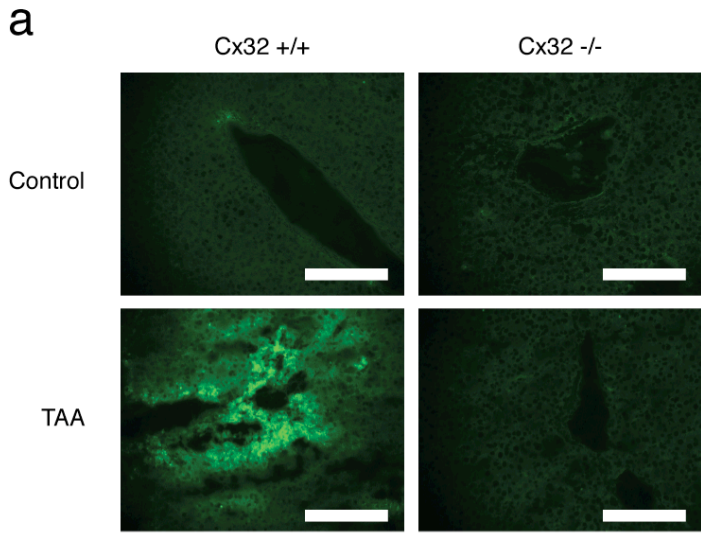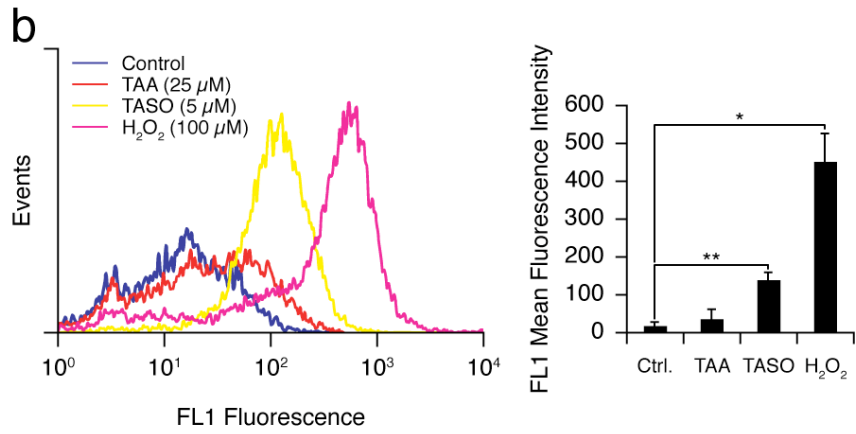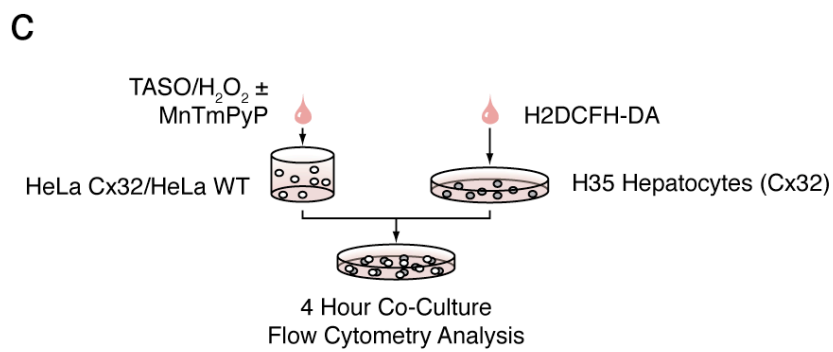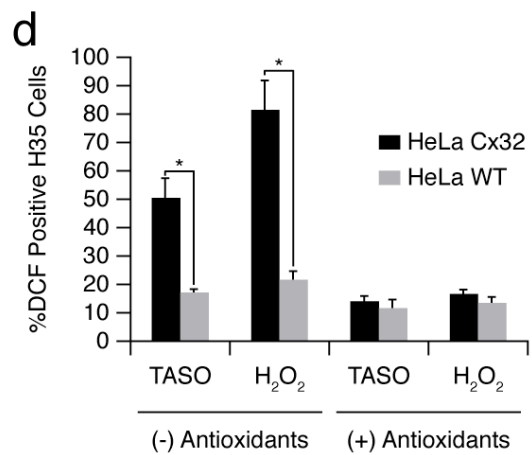

Supplement: NIHMS449575-supplement-Supplementary_Figure_3.pdf [file NIHMS449575-supplement-Supplementary_Figure_3.pdf]

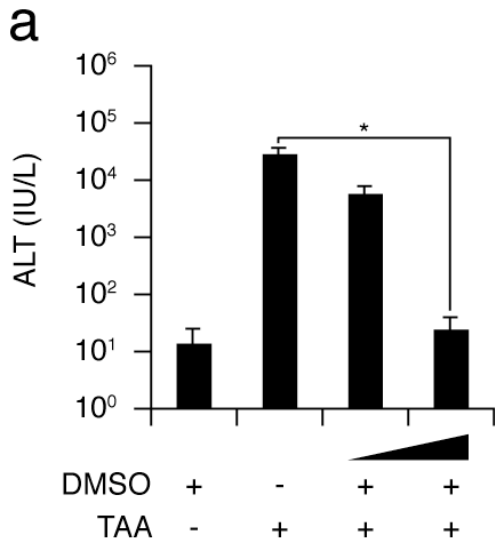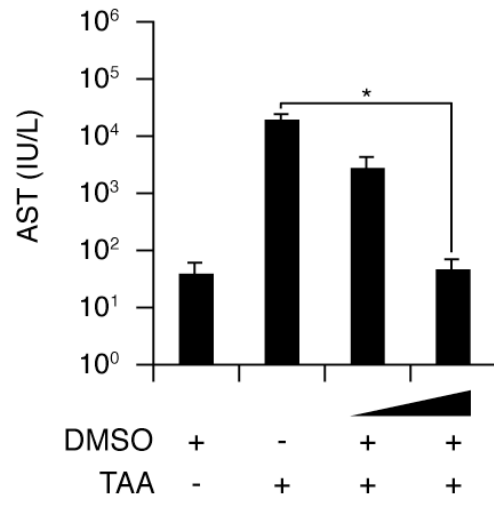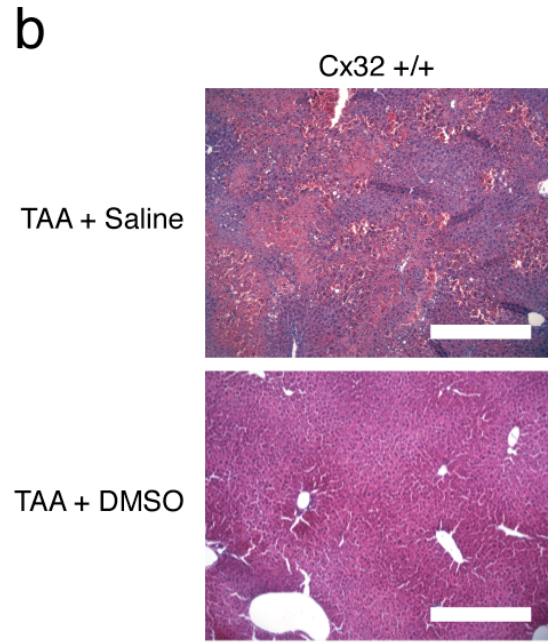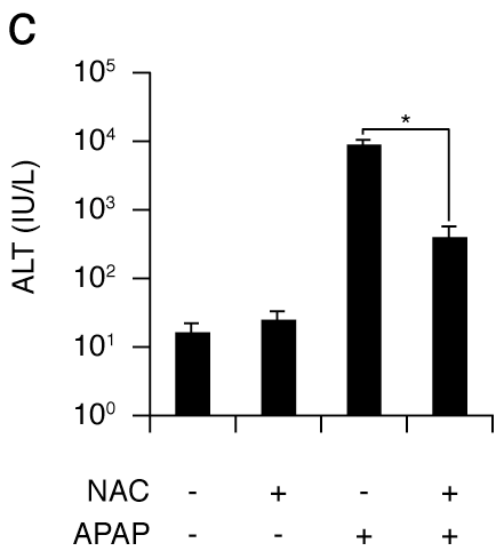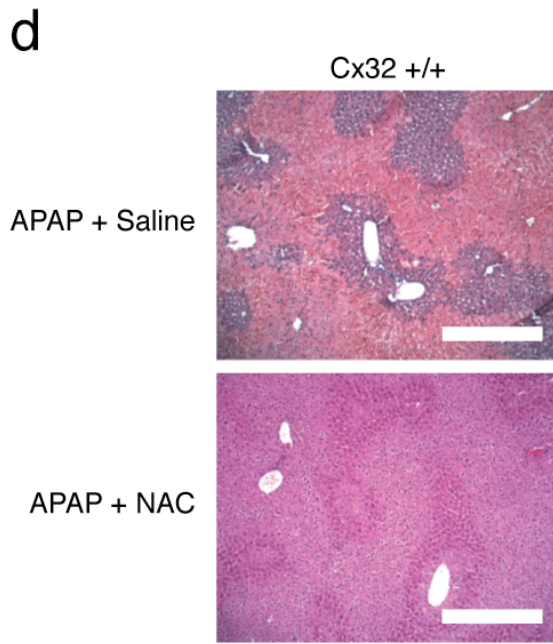

Supplement: NIHMS449575-supplement-Supplementary_Figure_4.pdf [file NIHMS449575-supplement-Supplementary_Figure_4.pdf]

Vehicle

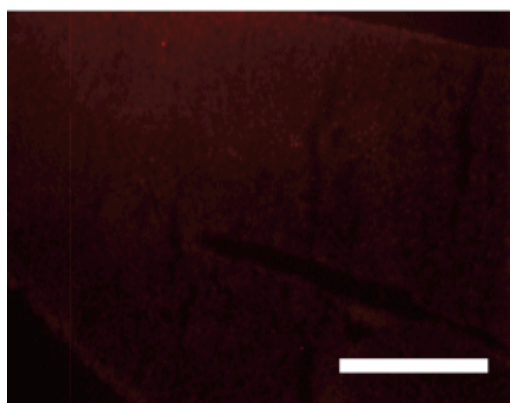

TAA

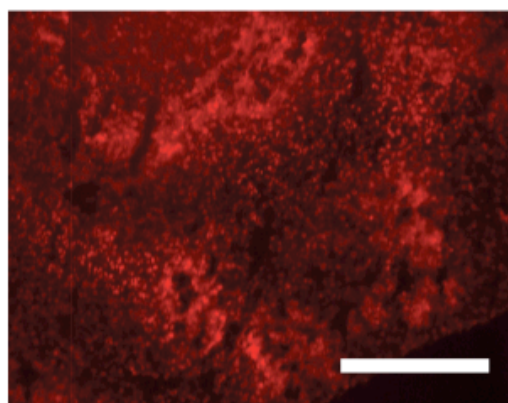

TAA + 2APB

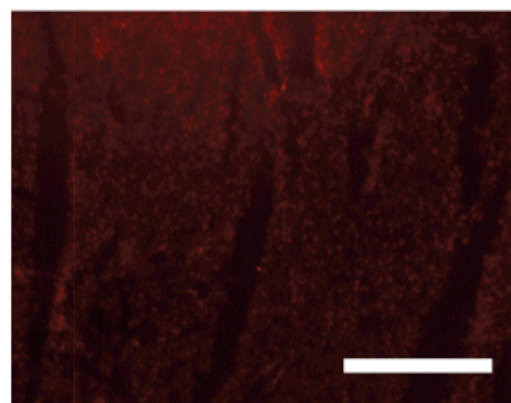

Supplement: NIHMS449575-supplement-Supplementary_Figure_5.pdf [file NIHMS449575-supplement-Supplementary_Figure_5.pdf]

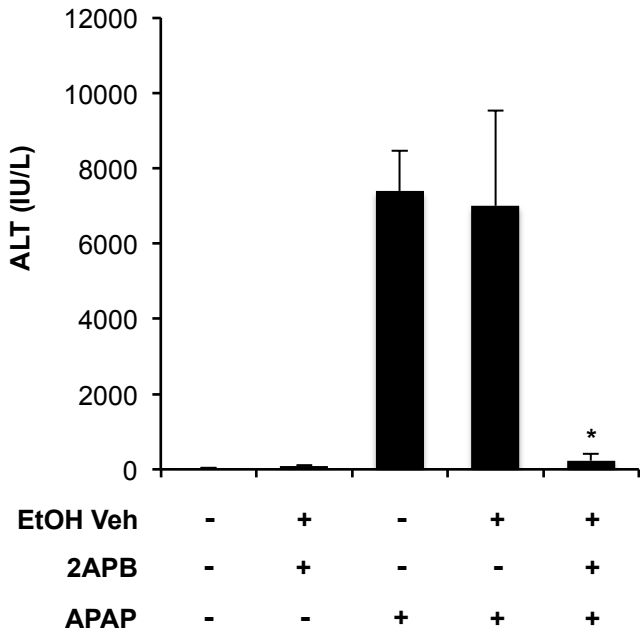

Supplement: NIHMS449575-supplement-Supplementary_Figure_6.pdf [file NIHMS449575-supplement-Supplementary_Figure_6.pdf]
